# Supplementary material for: Reporting of planned statistical methods in published surgical randomised trial protocols: a protocol for a methodological systematic review
Source: PubMed Central journal article supplement — BMJ Open. 2016 Jun 3;6(6):e011188. doi: 10.1136/bmjopen-2016-011188 (PMC4893854; doi:10.1136/bmjopen-2016-011188), 2016-06-03
Supplement: bmjopen-2016-011188supp_appendix.pdf [file bmjopen-2016-011188supp_appendix.pdf]

## APPENDIX A: Sample Data Extraction Form

| Part A - Study Characteristics |                                                                                                                |                                                                                                                                                                                                                                                                                                                                                                                                                                                                                                     |
|--------------------------------|----------------------------------------------------------------------------------------------------------------|-----------------------------------------------------------------------------------------------------------------------------------------------------------------------------------------------------------------------------------------------------------------------------------------------------------------------------------------------------------------------------------------------------------------------------------------------------------------------------------------------------|
| Item                           |                                                                                                                | Response Options                                                                                                                                                                                                                                                                                                                                                                                                                                                                                    |
| A1                             | First author's last name or study group name (e.g. HEALTH Investigators).                                      | Text                                                                                                                                                                                                                                                                                                                                                                                                                                                                                                |
| A2                             | Year of publication                                                                                            | Text                                                                                                                                                                                                                                                                                                                                                                                                                                                                                                |
| A3                             | Journal                                                                                                        | Text                                                                                                                                                                                                                                                                                                                                                                                                                                                                                                |
| A4                             | Country where the study is taking place (check all that apply).                                                | <input type="checkbox"/> Canada<br><input type="checkbox"/> USA<br><input type="checkbox"/> Netherlands<br><input type="checkbox"/> UK<br><input type="checkbox"/> Australia<br><input type="checkbox"/> Other (specify)<br><input type="checkbox"/> Unclear/not reported                                                                                                                                                                                                                           |
| A5                             | Funding source (check all that apply)                                                                          | <input type="checkbox"/> Industry<br><input type="checkbox"/> Government (e.g. CIHR, NIH)<br><input type="checkbox"/> Academic<br><input type="checkbox"/> Association/foundation/non-profit<br><input type="checkbox"/> Other (specify)<br><input type="checkbox"/> Unclear/not reported                                                                                                                                                                                                           |
| A6                             | Clinical trial identification number (e.g. clinicaltrials.gov number). If not reported specify "NR".           | Text                                                                                                                                                                                                                                                                                                                                                                                                                                                                                                |
| A7                             | Is this a single centre or multicentre trial?                                                                  | <input type="checkbox"/> Single centre<br><input type="checkbox"/> Multicentre<br><input type="checkbox"/> Unclear/not reported                                                                                                                                                                                                                                                                                                                                                                     |
| A8                             | Surgical specialty (check all that apply)                                                                      | <input type="checkbox"/> General surgery<br><input type="checkbox"/> Neurosurgery<br><input type="checkbox"/> Obstetrics & gynaecology<br><input type="checkbox"/> Oral & maxillofacial surgery<br><input type="checkbox"/> Orthopaedic & trauma surgery<br><input type="checkbox"/> Plastic surgery<br><input type="checkbox"/> Thoracic/cardiac surgery<br><input type="checkbox"/> Vascular surgery<br><input type="checkbox"/> Other (specify)<br><input type="checkbox"/> Unclear/not reported |
| A9                             | Patients' disease/condition of interest (e.g. rotator cuff tear, heart disease). If not reported specify "NR". | Text                                                                                                                                                                                                                                                                                                                                                                                                                                                                                                |
| A10                            | Type of surgical study.                                                                                        | <input type="checkbox"/> Surgery A vs. surgery B<br><input type="checkbox"/> Surgical vs. non-surgical<br><input type="checkbox"/> Timing of surgery (early vs. delayed)                                                                                                                                                                                                                                                                                                                            |
| A11                            | Control condition(s) (e.g. standard of care,                                                                   | Text                                                                                                                                                                                                                                                                                                                                                                                                                                                                                                |

|                                                | sham device, delayed surgery)                                                                                            |                                                                                                                                                                                 |
|------------------------------------------------|--------------------------------------------------------------------------------------------------------------------------|---------------------------------------------------------------------------------------------------------------------------------------------------------------------------------|
| A12                                            | Intervention condition(s)                                                                                                | Text                                                                                                                                                                            |
| A13                                            | Primary outcome. If not reported specify “NR”.                                                                           | Text                                                                                                                                                                            |
| A14                                            | Planned sample size. If not reported specify “NR”.                                                                       | Text                                                                                                                                                                            |
| A15                                            | Number of authors. If group authorship, how many investigators are reported?                                             | ###                                                                                                                                                                             |
| <b>Part B – Methodological Characteristics</b> |                                                                                                                          |                                                                                                                                                                                 |
| <b>Item</b>                                    |                                                                                                                          | <b>Response Options</b>                                                                                                                                                         |
| B1                                             | Is the planned allocation sequence generation adequate?                                                                  | <input type="checkbox"/> Adequate<br><input type="checkbox"/> Inadequate<br><input type="checkbox"/> Unclear/not reported                                                       |
| B2                                             | Does the planned allocation sequence generation allow for adequate allocation concealment?                               | <input type="checkbox"/> Adequate<br><input type="checkbox"/> Inadequate<br><input type="checkbox"/> Unclear/not reported                                                       |
| B3                                             | Will participants be adequately blinded?                                                                                 | <input type="checkbox"/> Adequate<br><input type="checkbox"/> Inadequate<br><input type="checkbox"/> Unclear/not reported<br><input type="checkbox"/> Not relevant/not possible |
| B4                                             | Will treatment providers be adequately blinded?                                                                          | <input type="checkbox"/> Adequate<br><input type="checkbox"/> Inadequate<br><input type="checkbox"/> Unclear/not reported<br><input type="checkbox"/> Not relevant/not possible |
| B5                                             | Will outcome assessors be adequately blinded?                                                                            | <input type="checkbox"/> Adequate<br><input type="checkbox"/> Inadequate<br><input type="checkbox"/> Unclear/not reported<br><input type="checkbox"/> Not relevant/not possible |
| B6                                             | If there is a risk of differential expertise across groups, does the protocol adequately account for this?               | <input type="checkbox"/> Adequate<br><input type="checkbox"/> Inadequate<br><input type="checkbox"/> Unclear/not reported<br><input type="checkbox"/> Not relevant              |
| B7                                             | Were outcomes selected to be objective, patient-important and assessed in a manner to limit bias?                        | <input type="checkbox"/> Adequate<br><input type="checkbox"/> Inadequate<br><input type="checkbox"/> Unclear/not reported                                                       |
| B8                                             | Is the planned sample size sufficiently large to assure a balance of prognosis and number of outcome events?             | <input type="checkbox"/> Adequate<br><input type="checkbox"/> Inadequate<br><input type="checkbox"/> Unclear/not reported                                                       |
| B9                                             | Are the planned statistical analyses (including subgroup, sensitivity, and adjusted analyses) selected to minimize bias? | <input type="checkbox"/> Adequate<br><input type="checkbox"/> Inadequate<br><input type="checkbox"/> Unclear/not reported                                                       |
| B10                                            | Does the funding source pose a risk of bias, or are there relevant conflicts of interest?                                | <input type="checkbox"/> Adequate<br><input type="checkbox"/> Inadequate<br><input type="checkbox"/> Unclear/not reported                                                       |
| <b>Part C – Statistical Reporting</b>          |                                                                                                                          |                                                                                                                                                                                 |

| Item                                                   |                                                                       | Response Options                                                                                                                                                                                        |
|--------------------------------------------------------|-----------------------------------------------------------------------|---------------------------------------------------------------------------------------------------------------------------------------------------------------------------------------------------------|
| C1 Primary analysis<br><br>Does the protocol report:   | a) which outcome the primary analysis is based on?                    | <input type="checkbox"/> Yes<br><input type="checkbox"/> No<br><input type="checkbox"/> Unclear                                                                                                         |
|                                                        | b) the planned statistical test for the primary outcome?              | <input type="checkbox"/> Yes (specify)<br><input type="checkbox"/> No<br><input type="checkbox"/> Unclear                                                                                               |
|                                                        | c) the intended effect measure (e.g. hazard ratio, relative risk)?    | <input type="checkbox"/> Yes<br><input type="checkbox"/> No<br><input type="checkbox"/> Unclear                                                                                                         |
|                                                        | d) the significance level?                                            | <input type="checkbox"/> Yes<br><input type="checkbox"/> No<br><input type="checkbox"/> Unclear                                                                                                         |
|                                                        | e) intended use of confidence intervals?                              | <input type="checkbox"/> Yes<br><input type="checkbox"/> No<br><input type="checkbox"/> Unclear                                                                                                         |
| C2 Secondary analyses<br><br>Does the protocol report: | a) whether secondary analyses are planned?                            | <input type="checkbox"/> Yes – secondary analyses planned<br><input type="checkbox"/> Yes – secondary analyses not planned<br><input type="checkbox"/> Not reported<br><input type="checkbox"/> Unclear |
|                                                        | b) the planned statistical test for each secondary outcome?           | <input type="checkbox"/> Yes<br><input type="checkbox"/> No<br><input type="checkbox"/> Partially reported<br><input type="checkbox"/> Unclear<br><input type="checkbox"/> N/A – no secondary analyses  |
|                                                        | c) the intended effect measure(s) (e.g. hazard ratio, relative risk)? | <input type="checkbox"/> Yes<br><input type="checkbox"/> No<br><input type="checkbox"/> Partially reported<br><input type="checkbox"/> Unclear<br><input type="checkbox"/> N/A– no secondary analyses   |
|                                                        | d) the significance level?                                            | <input type="checkbox"/> Yes<br><input type="checkbox"/> No<br><input type="checkbox"/> Partially reported<br><input type="checkbox"/> Unclear<br><input type="checkbox"/> N/A– no secondary analyses   |
|                                                        | e) intended use of confidence intervals?                              | <input type="checkbox"/> Yes<br><input type="checkbox"/> No<br><input type="checkbox"/> Partially reported<br><input type="checkbox"/> Unclear<br><input type="checkbox"/> N/A– no secondary analyses   |
| C3 Sample size<br><br>Does the protocol report:        | a) the planned number of participants to be included in the trial?    | <input type="checkbox"/> Yes<br><input type="checkbox"/> No<br><input type="checkbox"/> Unclear                                                                                                         |
|                                                        | b) which outcome the calculation is based on?                         | <input type="checkbox"/> Yes<br><input type="checkbox"/> No<br><input type="checkbox"/> Unclear                                                                                                         |
|                                                        | c) which statistical test the calculation is based on?                | <input type="checkbox"/> Yes<br><input type="checkbox"/> No                                                                                                                                             |

|                           |                                                                                                                                                  |                                                                                                                                                                                                       |
|---------------------------|--------------------------------------------------------------------------------------------------------------------------------------------------|-------------------------------------------------------------------------------------------------------------------------------------------------------------------------------------------------------|
|                           |                                                                                                                                                  | <input type="checkbox"/> Unclear                                                                                                                                                                      |
|                           | d) the values assumed for the outcome in each study group (eg, proportion with event, or mean and standard deviation)?                           | <input type="checkbox"/> Yes<br><input type="checkbox"/> No<br><input type="checkbox"/> Unclear                                                                                                       |
|                           | e) alpha level?                                                                                                                                  | <input type="checkbox"/> Yes<br><input type="checkbox"/> No<br><input type="checkbox"/> Unclear                                                                                                       |
|                           | f) power (or beta)?                                                                                                                              | <input type="checkbox"/> Yes<br><input type="checkbox"/> No<br><input type="checkbox"/> Unclear                                                                                                       |
|                           | g) a description of how the SS was calculated (e.g. provide a reference to a formula or name a statistical program)?                             | <input type="checkbox"/> Yes<br><input type="checkbox"/> No<br><input type="checkbox"/> Unclear                                                                                                       |
|                           | h) whether they plan to inflate the sample size for missing data or crossovers?                                                                  | <input type="checkbox"/> Yes<br><input type="checkbox"/> No<br><input type="checkbox"/> Unclear                                                                                                       |
|                           | i) additional explanations for sample size based on special designs, if applicable (e.g. intracluster correlation coefficient for cluster RCTs)? | <input type="checkbox"/> Yes<br><input type="checkbox"/> No<br><input type="checkbox"/> Unclear<br><input type="checkbox"/> N/A – not a special design                                                |
| C4 Subgroup analyses      | a) whether subgroup analyses are planned?                                                                                                        | <input type="checkbox"/> Yes – subgroups planned<br><input type="checkbox"/> Yes – subgroups not planned<br><input type="checkbox"/> Not reported<br><input type="checkbox"/> Unclear                 |
| Does the protocol report: | b) the number of planned subgroup analyses?                                                                                                      | <input type="checkbox"/> Yes (specify)<br><input type="checkbox"/> No<br><input type="checkbox"/> Unclear<br><input type="checkbox"/> N/A – no subgroups planned                                      |
|                           | c) which baseline variable(s) will be analysed?                                                                                                  | <input type="checkbox"/> Yes<br><input type="checkbox"/> No<br><input type="checkbox"/> Partially reported<br><input type="checkbox"/> Unclear<br><input type="checkbox"/> N/A – no subgroups planned |
|                           | d) rationale for each subgroup analysis?                                                                                                         | <input type="checkbox"/> Yes<br><input type="checkbox"/> No<br><input type="checkbox"/> Partially reported<br><input type="checkbox"/> Unclear<br><input type="checkbox"/> N/A – no subgroups planned |
|                           | e) definition of subgroup categories?                                                                                                            | <input type="checkbox"/> Yes<br><input type="checkbox"/> No<br><input type="checkbox"/> Partially reported<br><input type="checkbox"/> Unclear<br><input type="checkbox"/> N/A – no subgroups planned |
|                           | f) planned test(s) of interaction?                                                                                                               | <input type="checkbox"/> Yes<br><input type="checkbox"/> No<br><input type="checkbox"/> Unclear<br><input type="checkbox"/> N/A – no subgroups planned                                                |
| C5 Adjusted analyses      | a) whether adjusted analyses are planned?                                                                                                        | <input type="checkbox"/> Yes – adjusted analysis planned<br><input type="checkbox"/> Yes – adjusted analysis not planned                                                                              |

|                                                          |                                                                                                             |                                                                                                                                                                                                                                                                         |
|----------------------------------------------------------|-------------------------------------------------------------------------------------------------------------|-------------------------------------------------------------------------------------------------------------------------------------------------------------------------------------------------------------------------------------------------------------------------|
| Does the protocol report:                                |                                                                                                             | <input type="checkbox"/> Not reported<br><input type="checkbox"/> Unclear                                                                                                                                                                                               |
|                                                          | b) which variables will be used in the analysis, or how they will select the included variables?            | <input type="checkbox"/> Yes<br><input type="checkbox"/> No<br><input type="checkbox"/> Unclear<br><input type="checkbox"/> N/A – no adjusted analyses planned                                                                                                          |
|                                                          | c) how continuous variables will be handled, if applicable?                                                 | <input type="checkbox"/> Yes<br><input type="checkbox"/> No<br><input type="checkbox"/> Partially reported<br><input type="checkbox"/> Unclear<br><input type="checkbox"/> N/A – no adjusted analyses planned<br><input type="checkbox"/> N/A – no continuous variables |
| C6 Sensitivity analyses<br><br>Does the protocol report: | a) whether sensitivity analyses are planned?                                                                | <input type="checkbox"/> Yes – sensitivity analysis planned<br><input type="checkbox"/> Yes – sensitivity analysis not planned<br><input type="checkbox"/> Not reported<br><input type="checkbox"/> Unclear                                                             |
|                                                          | b) methods of the planned sensitivity analysis?                                                             | <input type="checkbox"/> Yes<br><input type="checkbox"/> No<br><input type="checkbox"/> Partially reported<br><input type="checkbox"/> Unclear<br><input type="checkbox"/> N/A – no sensitivity analyses planned                                                        |
| C7 Interim analyses<br><br>Does the protocol report:     | a) whether interim analyses are planned?                                                                    | <input type="checkbox"/> Yes – interim analysis planned<br><input type="checkbox"/> Yes – interim analysis not planned<br><input type="checkbox"/> Not reported<br><input type="checkbox"/> Unclear                                                                     |
|                                                          | b) number of interim analyses planned?                                                                      | <input type="checkbox"/> Yes (specify)<br><input type="checkbox"/> No<br><input type="checkbox"/> Unclear<br><input type="checkbox"/> N/A – no interim analyses planned                                                                                                 |
|                                                          | c) timing of the planned interim analyses?                                                                  | <input type="checkbox"/> Yes<br><input type="checkbox"/> No<br><input type="checkbox"/> Unclear<br><input type="checkbox"/> N/A – no interim analyses planned                                                                                                           |
|                                                          | d) whether any adaptations will be made based on interim analysis results (e.g. sample size recalculation)? | <input type="checkbox"/> Yes<br><input type="checkbox"/> No<br><input type="checkbox"/> Unclear<br><input type="checkbox"/> N/A – no interim analyses planned                                                                                                           |
| C8 Stopping guidelines<br><br>Does the                   | a) who has final authority over deciding whether/when to stop the trial early?                              | <input type="checkbox"/> Yes (specify)<br><input type="checkbox"/> No<br><input type="checkbox"/> Unclear                                                                                                                                                               |
|                                                          | b) objective statistical or other criteria for                                                              | <input type="checkbox"/> Yes                                                                                                                                                                                                                                            |

|                                                         |                                                                                                                           |                                                                                                                                                                                                                                                                                                                                                                                                                                                                                                          |
|---------------------------------------------------------|---------------------------------------------------------------------------------------------------------------------------|----------------------------------------------------------------------------------------------------------------------------------------------------------------------------------------------------------------------------------------------------------------------------------------------------------------------------------------------------------------------------------------------------------------------------------------------------------------------------------------------------------|
| protocol report:                                        | determining whether/when to stop for futility?                                                                            | <input type="checkbox"/> No<br><input type="checkbox"/> Unclear                                                                                                                                                                                                                                                                                                                                                                                                                                          |
|                                                         | c) objective statistical or other criteria for determining whether/when to stop for harm/benefit?                         | <input type="checkbox"/> Yes<br><input type="checkbox"/> No<br><input type="checkbox"/> Unclear                                                                                                                                                                                                                                                                                                                                                                                                          |
| C9 Analysis population<br><br>Does the protocol report: | a) the intended analysis population (e.g. all randomized participants regardless of protocol adherence, intent-to-treat)? | <input type="checkbox"/> Yes – provides full description/definition<br><input type="checkbox"/> Yes – but uses ambiguous descriptor like “intent-to-treat” or “per protocol”<br><input type="checkbox"/> No<br><input type="checkbox"/> Unclear                                                                                                                                                                                                                                                          |
| C10 Missing data<br><br>Does the protocol report:       | a) method planned to account for missing data (e.g. multiple imputation)?                                                 | <input type="checkbox"/> Yes<br><input type="checkbox"/> No<br><input type="checkbox"/> Unclear                                                                                                                                                                                                                                                                                                                                                                                                          |
| C11 Multiplicity<br><br>Does the protocol report:       | a) method planned to account for multiple testing, if applicable?                                                         | <input type="checkbox"/> Yes<br><input type="checkbox"/> No<br><input type="checkbox"/> Unclear<br><input type="checkbox"/> N/A - no risk of multiple testing                                                                                                                                                                                                                                                                                                                                            |
| C12 Other                                               | a) Does this study have a special design that would affect the statistical methods?                                       | <input type="checkbox"/> No, two group parallel superiority design<br><input type="checkbox"/> Equivalence or non-inferiority<br><input type="checkbox"/> Cluster<br><input type="checkbox"/> Factorial (2x2)<br><input type="checkbox"/> Factorial (3x2)<br><input type="checkbox"/> Factorial (bigger than 3x2)<br><input type="checkbox"/> More than two groups (not factorial)<br><input type="checkbox"/> Crossover<br><input type="checkbox"/> Unclear<br><input type="checkbox"/> Other (specify) |
|                                                         | b) What type of variable is the primary outcome?                                                                          | <input type="checkbox"/> Continuous - Interval<br><input type="checkbox"/> Continuous - Ratio<br><input type="checkbox"/> Categorical - Ordinal<br><input type="checkbox"/> Categorical - Nominal<br><input type="checkbox"/> Categorical - Binary<br><input type="checkbox"/> Unclear<br><input type="checkbox"/> Not reported                                                                                                                                                                          |
|                                                         | c) Please add any comments here for further discussion                                                                    | Text (optional)                                                                                                                                                                                                                                                                                                                                                                                                                                                                                          |
